# Supplementary material for: Arid1a mutation suppresses TGF-β signaling and induces cholangiocarcinoma
Source: PubMed Central journal article supplement — Cell Rep. Author manuscript; Available in PMC 2023 Jan 3. (PMC9808599; doi:10.1016/j.celrep.2022.111253), 2022-08-30
Supplement: NIHMS1833560-supplement-1.pdf [file NIHMS1833560-supplement-1.pdf]

**Supplemental information**

***Arid1a* mutation suppresses TGF- $\beta$  signaling  
and induces cholangiocarcinoma**

**Bing Guo, Scott C. Friedland, William Alexander, Jacquelyn A. Myers, Wenjia Wang, Michael R. O'Dell, Michael Getman, Christa L. Whitney-Miller, Diana Agostini-Vulaj, Aaron R. Huber, Stephano S. Mello, Paula M. Vertino, Hartmut K. Land, Laurie A. Steiner, and Aram F. Hezel**

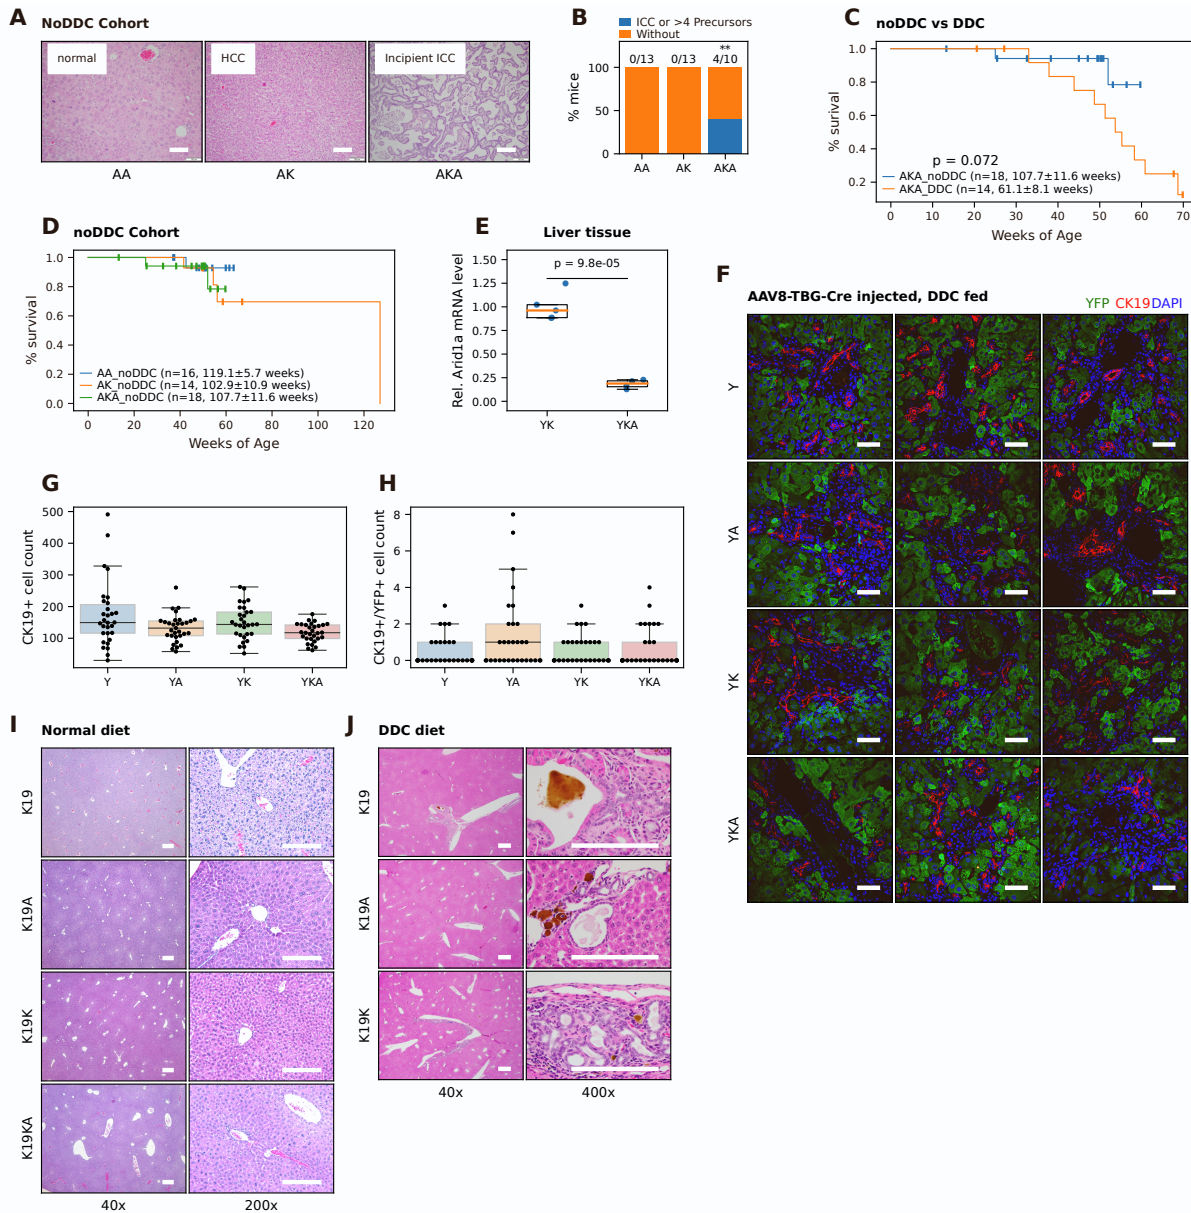

**Figure S1. Extended data on the cooperative role of *Kras/Arid1a* mutations in liver homeostasis and tumorigenesis (Related to Figure 1)**

A. Representative H&E images of noDDC *AKA*, *AK*, and *AA* livers harvested at around 50 weeks old. Scale bar 100  $\mu$ m.

B. Frequencies of CC and CC precursors in *AKA* (n=10), *AK* (n=13), and *AA* (n=13) mice of the noDDC cohorts. The frequency in the *AKA* cohort is different *AA* and *AK* (Fisher's exact test,  $p < 0.05$ ). More details are available in **Table S1**.

C. Survival curve of *AKA\_DDC* versus *AKA\_noDDC* cohort. Log-rank test p value is 0.072.

D. Survival curve of *AKA*, *AK*, *AA* mice without DDC treatment.

E. RT-qPCR quantification of *Arid1a* mRNA in *YK* (n=5) and *YKA* (n=4) livers that were infected with AAV8-TBG-Cre viruses. *Arid1a* mRNA is significantly lower in *YKA* liver (0.183 $\pm$ 0.046) than *YK* liver (1.000 $\pm$ 0.153, Student's t-test  $p = 9.8e-5$ )

F. YFP/CK19 co-staining images of livers from *Y*, *YK*, *YA* and *YKA* mice that were injected with AAV8-TBG-Cre viruses and fed with DDC for 6 weeks. Each image represents a randomly selected field of a different mouse of the specified genotype. The widespread signal of YFP confirmed a high AAV8-TBG-Cre recombination efficiency consistent with RT-qPCR data in E. Scale bar 50  $\mu$ m.

G and H. Cell counts of CK19 $^{+}$  cells (G) and CK19 $^{+}$ /YFP $^{+}$  cells (H) in AAV8-DDC mice (extending **Figure 1H**).

I. H&E staining showing pathology of *K19KA*, *K19K*, *K19A*, *K19* livers that were not injured when feeding a normal diet (no DDC). Scale bar 200  $\mu$ m.

J. Rare lesions observed in *K19K*, *K19A*, *K19* livers that were injured when feeding with DDC diet. The top right and bottom right panels show rare expansion of large ducts of *K19* and *K19K* liver (DDC diet); the middle right panel shows rare singular dilated duct in *K19A* liver (DDC diet). Scale bar 200  $\mu$ m.

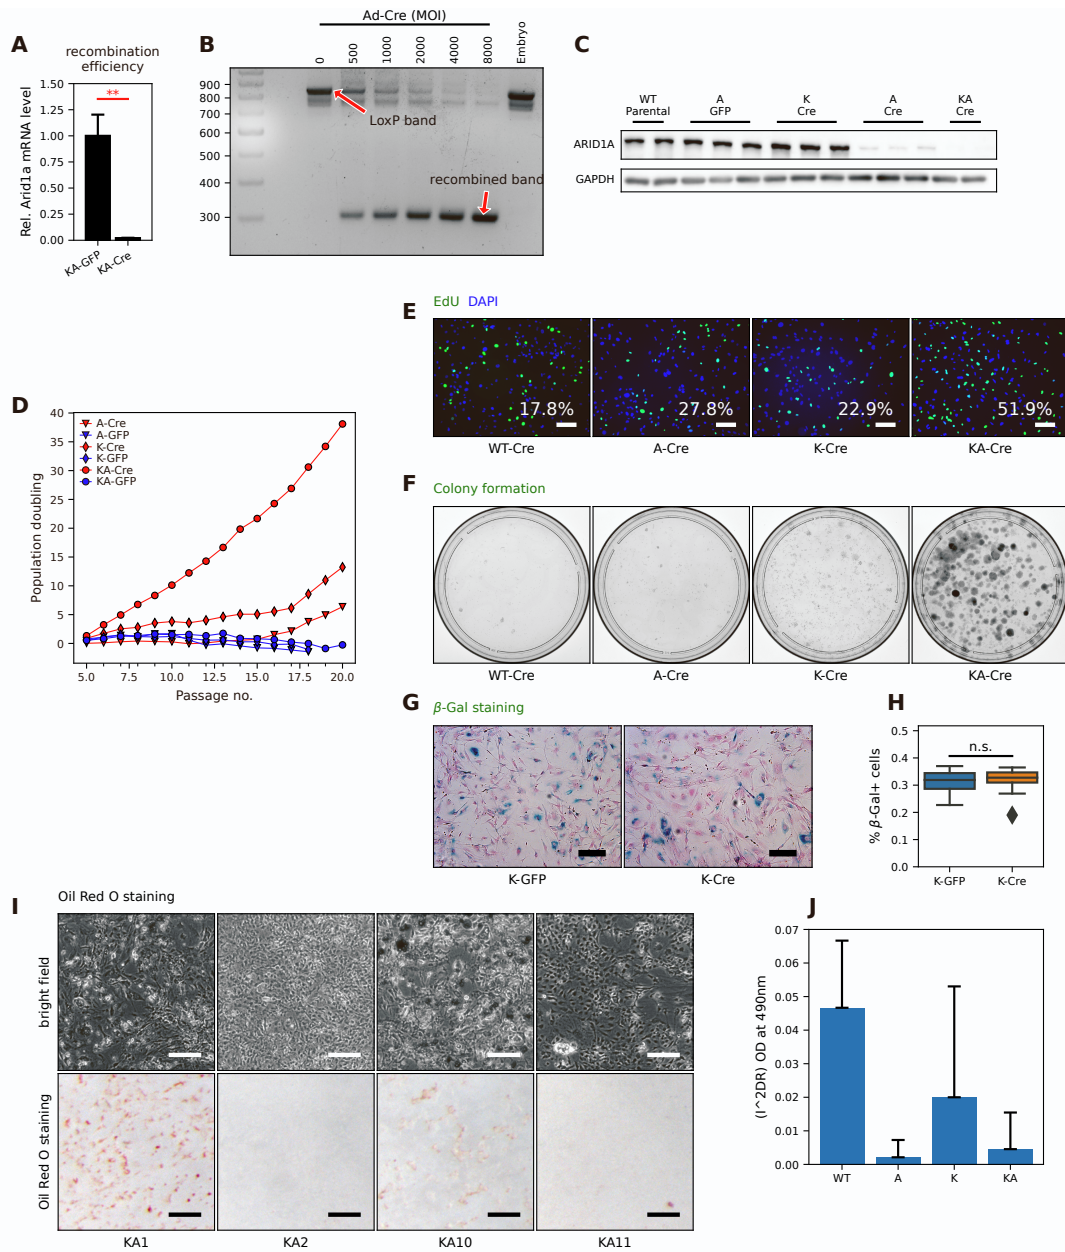

**Figure S2. Validation of Cre-recombination efficiency and cancer-associated phenotypes in *Kras/Arid1a* co-mutant MEFs (Related to Figure 2)**

A. RT-qPCR quantification of *Arid1a* mRNA in *KA* MEFs after *Ad5-CMV-GFP* and *Ad5-CMV-Cre* infection.

B. PCR products of genomic DNA showing decreased intensity of the LoxP (unrecombined, 845bp) band and increased intensity of the recombined band (298 bp) as increasing multiplicity of infection (MOI) of *Ad5-CMV-Cre* viruses were used to infect the *Arid1a*<sup>L/L</sup> MEFs.

C. Western blot showing the ARID1A protein levels in MEFs with different genotypes after virus infection (*Ad5-CMV-Cre* vs *Ad5-CMV-GFP*).

D. A separate set of 3T3 experiments accompanying **Figure 2B** showing a similar pattern of population doubling of *A-Cre*, *K-Cre*, and *KA-Cre* MEFs and their controls.

E. Representative images of EdU incorporation and DAPI staining of *WT-Cre*, *A-Cre*, *K-Cre*, and *KA-Cre* MEFs. Scale bar 50  $\mu$ m.

F. Colony formation assay of recombined MEFs (different cell lines from those in Figure 2D) showing a similar and obvious increase in colonies formed in *KA-Cre* compared to the other three genotypes.

G-H. Representative images (G) and quantification (H) of senescence-associated beta-galactosidase staining in *K-Cre* (*K* MEFs infected with *Ad5-CMV-Cre* viruses) and *K-GFP* (*K* MEFs infect with *Ad5-CMV-GFP* control viruses, n=3). Scale bar 50  $\mu$ m.

I. Representative images of bright field (upper panel) and Oil Red O (a dye staining lipids) staining (lower panel) of MEFs of different genotypes after the treatment of I2DR, a cocktail known to drive adipocyte differentiation. Scale bar 50  $\mu$ m.

J. Quantification of Oil Red O staining for adipocyte differentiation in MEFs of different genotypes.

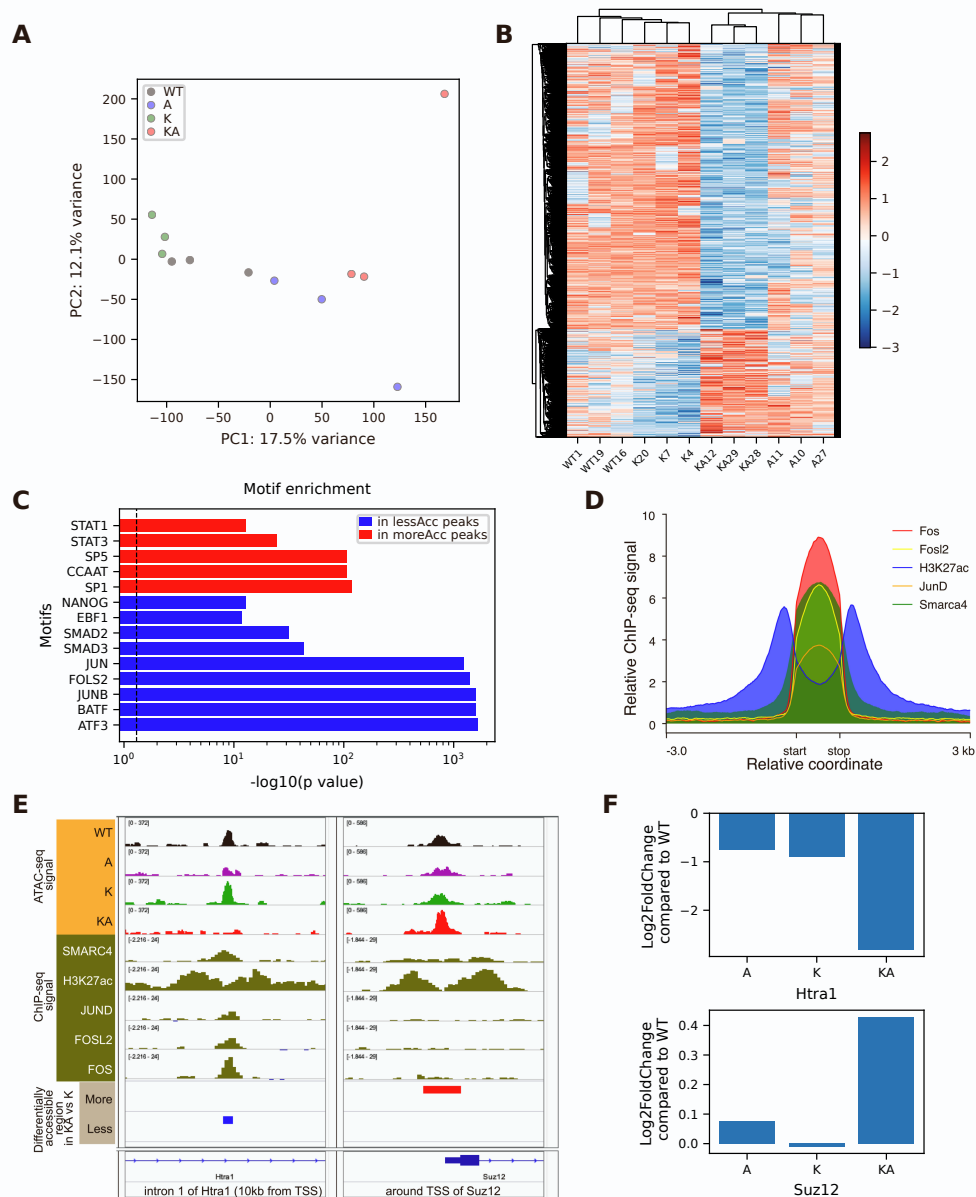

**Figure S3. Extended data supporting chromatin accessibility changes induced by *Kras/Arid1a* mutations in MEFs (Related to Figure 2)**

A. Principal component analysis of ATAC-seq counts (quantile normalized, log<sub>2</sub> transformed) across all ATAC regions in *KA* versus *K* MEFs.

B. Heatmap of row-wise z score of log<sub>2</sub> transformed ATAC-seq count matrix for differentially accessible regions ( $p_{adj} < 0.05$  and  $\log_2$ FoldChange  $> 0.5$  or  $< -0.5$ ). Hierarchical clustering was performed on columns and rows using the Canberra distance metric and average linkage method.

C. Motif enrichment analyses in more accessible peaks and less accessible peaks (in *KA* vs *K* MEFs) via Homer findMotifsGenome.pl. The most significant (with least p values) enrichment items of motifs of interest (indicated as y axis tick labels) were plotted. The vertical dotted line represents a p value equal to 0.05.

D. Publicly available ChIP-Seq data (GSE83295) demonstrating co-location of AP1 factor binding regions with less accessible regions in *KA* versus *K* MEFs.

E. Representative differentially accessible regions aligned with ATAC-seq data and ChIP-seq data as well as nearest genes. *Htra1* represents genes associated with less accessible regions (left), and *Suz12* represent genes with more accessible regions (right).

F. RNA-seq  $\log_2$ FoldChange of *Htra1* and *Suz12* in *A*, *K*, and *KA* MEFs compared to *WT* MEFs.

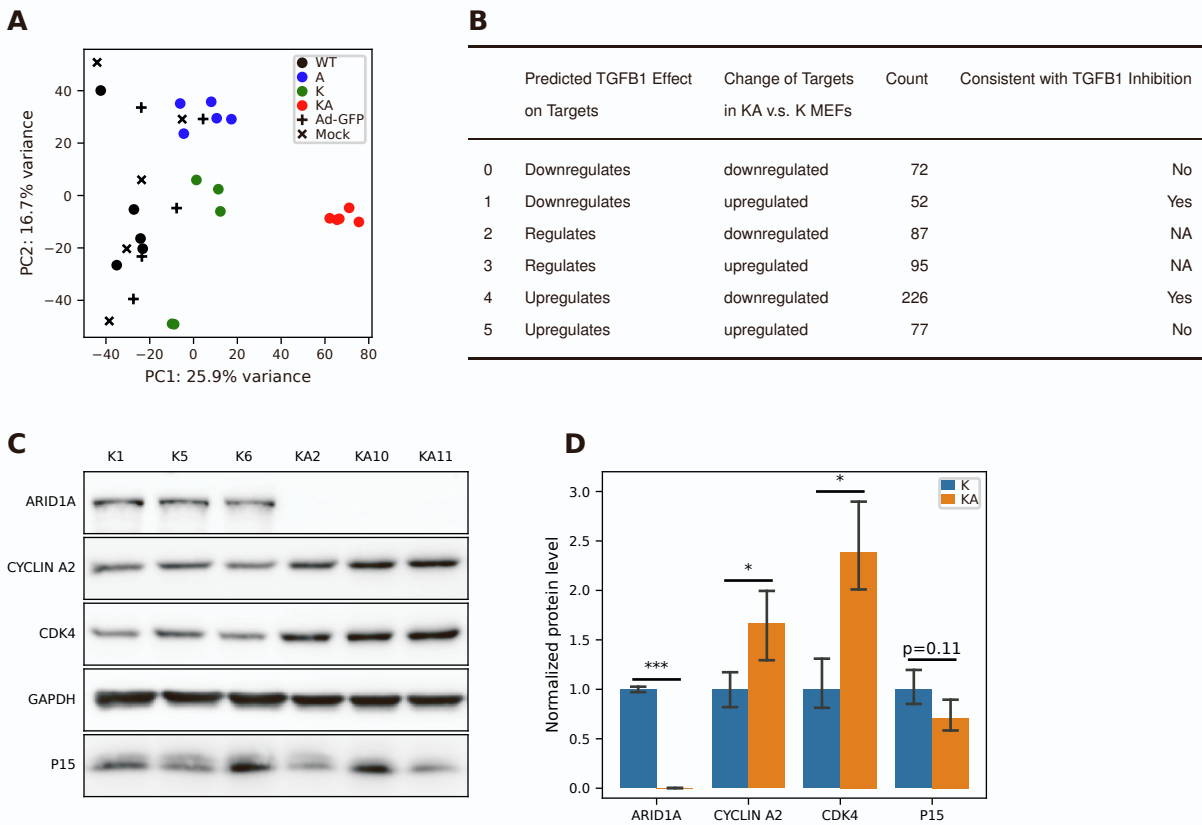

**Figure S4. Extended data supporting the dysregulation of cycle cell control and TGF $\beta$  pathways in *Arid1a* null *Kras*<sup>G12D</sup> MEFs (Related to Figure 3)**

A. Principal component analysis of RNA-seq data showing the distribution of both recombined MEFs (*WT-Cre*, *A-Cre*, *K-Cre*, and *KA-Cre*) and non-recombined (*Ad5-CMV-eGFP* or Mock infected) MEFs.

B. A summary table showing the majority of TGFB1 targets (provided by Ingenuity Pathway Analysis program) are regulated in a pattern consistent with TGFB inhibition according to the predicted TGFB1 effects on its targets.

C-D. Western blot (C) and its quantification (D) for proliferation-related proteins in *KA* (n=3 cell lines) vs *K* (n=3 cell lines) MEFs. Relative protein band intensity was calculated against GAPDH per lane, which was then normalized to the mean of *K* MEFs per protein. The expression of each protein in *K* vs *KA* MEFs were compared using *Student's t* test. \*  $p < 0.5$  and \*\*\*  $p < 0.001$ .

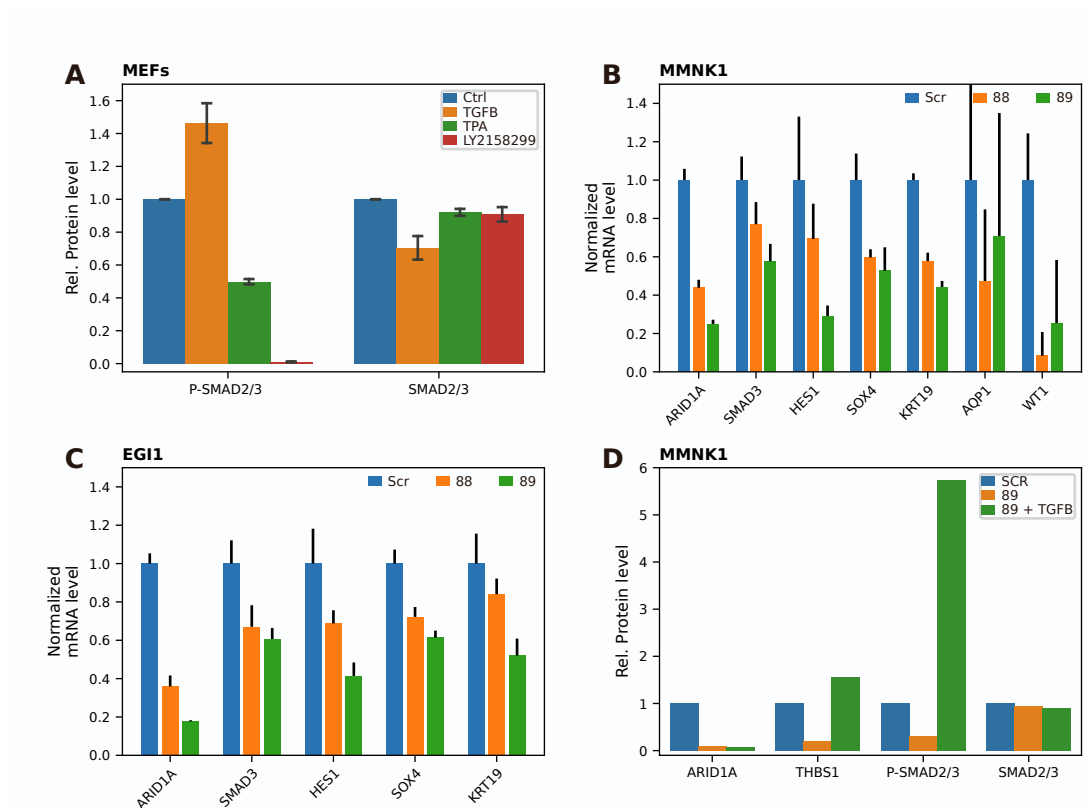

**Figure S5. Extended data supporting the effect of ARID1A loss in cholangiocyte differentiation and TGFβ-Smad4 signaling (Related to Figure 5)**

A. Quantification of Western blot bands of *KA* MEFs (for **Figure 5B**). The protein levels were normalized to the corresponding controls (GAPDH).

B-C. RT-qPCR of cholangiocyte differentiation markers and key genes of Notch pathway in MMNK1 cells (B) and in human cholangiocarcinoma cell EGI1 (C) with *ARID1A* KD (#88 and #89 knockdown constructs) or without (Scr).

D. Quantification of Western blot bands of MMNK1 *ARID1A* knockdown cells (**Figure 5G**). The protein levels were normalized to the corresponding controls (GAPDH).

**Table S2. Top 20 inhibited and activated upstream regulators of differentially expressed genes in KA versus K MEFs from IPA analysis (Related to Figure 3)**

| Upstream Regulator | Expression Log Ratio | Molecule Type                     | Predicted Activation State | Activation z-score | p-value of overlap |
|--------------------|----------------------|-----------------------------------|----------------------------|--------------------|--------------------|
| TGFB1              | -0.772               | growth factor                     | Inhibited                  | -6.568             | 3.40E-30           |
| CDKN2A             | -0.792               | transcription regulator           | Inhibited                  | -6.562             | 3.53E-11           |
| TNF                |                      | cytokine                          | Inhibited                  | -5.651             | 2.74E-12           |
| XBP1               | -0.33                | transcription regulator           | Inhibited                  | -5.517             | 1.32E-06           |
| IL1A               |                      | cytokine                          | Inhibited                  | -4.815             | 4.44E-03           |
| SREBF1             |                      | transcription regulator           | Inhibited                  | -4.744             | 3.29E-02           |
| IL1B               |                      | cytokine                          | Inhibited                  | -4.604             | 1.60E-04           |
| NUPR1              | -1.028               | transcription regulator           | Inhibited                  | -4.431             | 7.74E-11           |
| TCF7L2             | 0.316                | transcription regulator           | Inhibited                  | -4.314             | 2.52E-06           |
| TET2               |                      | enzyme                            | Inhibited                  | -4.251             | 2.83E-02           |
| TP53               | 0.205                | transcription regulator           | Inhibited                  | -4.209             | 9.52E-34           |
| IFNG               |                      | cytokine                          | Inhibited                  | -4.146             | 9.92E-03           |
| AGT                | -2.392               | growth factor                     | Inhibited                  | -4.137             | 9.85E-10           |
| TGM2               |                      | enzyme                            | Inhibited                  | -4.119             | 8.49E-03           |
| SMARCA4            | 0.208                | transcription regulator           | Inhibited                  | -4.112             | 5.03E-06           |
| RB1                |                      | transcription regulator           | Inhibited                  | -4.064             | 5.41E-09           |
| IL5                |                      | cytokine                          | Inhibited                  | -4.019             | 4.13E-05           |
| TFEB               |                      | transcription regulator           | Inhibited                  | -3.977             | 9.32E-03           |
| ATF4               |                      | transcription regulator           | Inhibited                  | -3.92              | 6.65E-06           |
| CD38               |                      | enzyme                            | Inhibited                  | -3.916             | 9.46E-05           |
| NTRK2              |                      | kinase                            | Activated                  | 3.106              | 1.88E-06           |
| PRKAA1             |                      | kinase                            | Activated                  | 3.114              | 1.71E-07           |
| PRKAA2             |                      | kinase                            | Activated                  | 3.116              | 2.62E-06           |
| ZNF106             | -0.292               | other                             | Activated                  | 3.207              | 1.35E-01           |
| BMI1               |                      | transcription regulator           | Activated                  | 3.214              | 9.60E-03           |
| NEUROG1            |                      | transcription regulator           | Activated                  | 3.273              | 3.10E-02           |
| MTM1               | -0.657               | phosphatase                       | Activated                  | 3.274              | 1.11E-03           |
| AREG               |                      | growth factor                     | Activated                  | 3.372              | 2.15E-02           |
| miR-122-5p         |                      | mature microRNA                   | Activated                  | 3.423              | 3.67E-02           |
| TBX2               | 1.737                | transcription regulator           | Activated                  | 3.5                | 2.93E-10           |
| AHR                |                      | ligand-dependent nuclear receptor | Activated                  | 3.554              | 1.33E-08           |
| MYC                |                      | transcription regulator           | Activated                  | 3.573              | 4.14E-18           |
| E2F1               |                      | transcription regulator           | Activated                  | 3.587              | 5.05E-10           |
| MYCN               | 1.444                | transcription regulator           | Activated                  | 3.615              | 6.93E-02           |
| E2f                |                      | group                             | Activated                  | 4.156              | 1.23E-07           |
| EP400              |                      | other                             | Activated                  | 4.205              | 3.74E-10           |
| Alpha catenin      |                      | group                             | Activated                  | 4.274              | 2.45E-07           |
| RABL6              |                      | other                             | Activated                  | 4.342              | 7.19E-08           |
| 26s Proteasome     |                      | complex                           | Activated                  | 4.479              | 6.08E-04           |
| INSIG1             |                      | other                             | Activated                  | 4.503              | 2.37E-01           |

**Table S3. Genotyping and RT-qPCR primer sequences (Related to Figure 1, 2, 4 and 5)**

| <b>Category</b>   | <b>Gene or allele</b>            | <b>Species</b>           | <b>Primer sequence (5'-3')</b>                                                   | <b>Comment</b> |
|-------------------|----------------------------------|--------------------------|----------------------------------------------------------------------------------|----------------|
| Genotyping primer | <i>Alb-Cre</i>                   | Mouse                    | ATGAAATGCGAGGTAAGTATGG<br>CGCCGCATAACCAGTCAAAC                                   |                |
|                   | <i>CK19-Cre<sup>ERT</sup></i>    | Mouse                    | AATCGCCAGGAATTGACCAATGGGG<br>CGGCAAACGGACAGAAGCATTTC<br>CGCCCGTACCCCAAAGGAAGACAT |                |
|                   | <i>Kras<sup>LSL-G12D</sup></i>   | Mouse                    | TCCGAATTCAGTGACTACAGATG<br>CTAGCCACCATGGCTTGAGT<br>ATGTCTTTCCCCAGCACAGT          |                |
|                   | <i>Arid1a<sup>L/L</sup></i>      | Mouse                    | GTAATGGGAAAGCGACTACTGGAG<br>TGTTTCATTTTTGTGGCGGGAG                               |                |
|                   | <i>Rosa26<sup>LSL-eYFP</sup></i> | Mouse                    | GCGAAGAGTTTGTCTCAACC<br>GGAGCGGGAGAAATGGATATG<br>AAAGTCGCTCTGAGTTGTTAT           |                |
| RT-qPCR primer    | <i>ARID1A</i>                    | Human                    | CAGTACCTGCCTCGCACATA                                                             | Forward        |
|                   |                                  |                          | GCCAGGAGACCAGACTTGAG                                                             | Reverse        |
|                   | <i>RHOA</i>                      | Human                    | TGGAAAGACATGCTTGCTCAT                                                            | Forward        |
|                   |                                  |                          | GCCTCAGGCGATCATAATCTTC                                                           | Reverse        |
|                   | <i>SMAD3</i>                     | Human                    | TCAACACCAAGTGCATCACC                                                             | Forward        |
|                   |                                  |                          | CGGCAGTAGATGACATGAGG                                                             | Reverse        |
|                   | <i>HES1</i>                      | Human                    | GAAAGATAGCTCGCGGCATT                                                             | Forward        |
|                   |                                  |                          | TACTTCCCCAGCACACTTGG                                                             | Reverse        |
|                   | <i>SOX4</i>                      | Human                    | AGCGACAAGATCCCTTTCATTC                                                           | Forward        |
|                   |                                  |                          | CGTTGCCGGACTTCACCTT                                                              | Reverse        |
|                   | <i>KRT19</i>                     | Human                    | CACCAGCCGGACTGAAGAAT                                                             | Forward        |
|                   |                                  |                          | GCAGGTCAGTAACCTCGGAC                                                             | Reverse        |
|                   | <i>AQP1</i>                      | Human                    | TAACCCTGCTCGGTCCCTTG                                                             | Forward        |
|                   |                                  |                          | AGTCGTAGATGAGTACAGCCAG                                                           | Reverse        |
|                   | <i>WT1</i>                       | Human                    | GTGACTTCAAGGACTGTGAACG                                                           | Forward        |
|                   |                                  |                          | CGGGAGAACTTTCGCTGACAA                                                            | Reverse        |
| <i>Arid1a</i>     | Mouse                            | ATGGCCAATATGCCACCTCA     | Forward                                                                          |                |
|                   |                                  | CCATAGGGAGGTCCAGTTCC     | Reverse                                                                          |                |
| <i>Rhoa</i>       | Mouse                            | AGCTTGTGGTAAGACATGCTTG   | Forward                                                                          |                |
|                   |                                  | GTGTCCCATAAAGCCAACCTCTAC | Reverse                                                                          |                |
| <i>Hes1</i>       | Mouse                            | CCAGCCAGTGTCAACACGA      | Forward                                                                          |                |
|                   |                                  | AATGCCGGGAGCTATCTTTCT    | Reverse                                                                          |                |
| <i>Tgfb1</i>      | Mouse                            | AGCTGCGCTTGCAGAGATTA     | Forward                                                                          |                |
|                   |                                  | AGCCCTGTATTCCGTCTCCT     | Reverse                                                                          |                |
